1 Does insect herbivory suppress ecosystem productivity? Evidence from a temperate  
2 woodland

3

4 Kristiina Visakorpi\*: Department of Zoology, University of Oxford, Oxford, UK,  
5 kristiina.matilda@gmail.com.

6 Sofia Gripenberg: School of Biological Sciences, University of Reading, Reading, UK,  
7 s.gripenberg@reading.ac.uk

8 Yadvinder Malhi: Environmental Change Institute, School of Geography and the  
9 Environment, University of Oxford, Oxford, UK, yadvidner.malhi@ouce.ox.ac.uk

10 Terhi Riutta: Environmental Change Institute, School of Geography and the Environment,  
11 University of Oxford, Oxford, UK; Imperial College London, Department of Life Sciences,  
12 Silwood Park Campus, Ascot, UK, terhi.riutta@ouce.ox.ac.uk

13

14 \*Corresponding author

15

16

17

18

19

20

21

22 Author contributions: Conceived and designed study: KV, SG, TR; Performed research: KV;

23 Analyzed data: KV; Wrote the paper: KV, SG, TR, YM

24 **Abstract**

25 Our current understanding of the relationship between insect herbivory and ecosystem  
26 productivity is limited. Previous studies have typically quantified only leaf area loss, or have  
27 been conducted during outbreak years. These set-ups often ignore the physiological changes  
28 taking place in the remaining plant tissue after insect attack, or may not represent typical,  
29 non-outbreak herbivore densities. Here, we estimate the amount of carbon lost to insect  
30 herbivory in a temperate deciduous woodland both through leaf area loss and, notably,  
31 through changes in leaf gas exchange in non-consumed leaves under non-outbreak densities  
32 of insects. We calculate how net primary productivity changes with decreasing and increasing  
33 levels of herbivory, and estimate what proportion of the carbon involved in the leaf area loss  
34 is transferred further in the food web. We estimate that the net primary productivity of an oak  
35 stand under ambient levels of herbivory is 54 - 69% lower than that of a completely intact  
36 stand. The effect of herbivory quantified only as leaf area loss ( $0.1 \text{ Mg C ha}^{-1} \text{ yr}^{-1}$ ) is  
37 considerably smaller than when the effects of herbivory on leaf physiology are included ( $8.5$   
38  $\text{Mg C ha}^{-1} \text{ yr}^{-1}$ ). We propose that the effect of herbivory on primary productivity is non-linear  
39 and mainly determined by changes in leaf gas exchange. We call for replicated studies in  
40 other systems to validate the relationship between insect herbivory and ecosystem  
41 productivity described here.

42

43

44

45

46 **Keywords:** insect herbivory, carbon cycle, net primary productivity, gross primary  
47 productivity, respiration, *Quercus robur*, *Operophtera brumata*, Wytham Woods

48

## 49 **Introduction**

50 By affecting plant abundance, distribution and physiology, herbivores can have large impacts  
51 on ecosystem carbon storage and cycling (Chapin 1997, Kurz et al. 2008, Clark et al. 2010,  
52 Schäfer et al. 2010, Heliasz et al. 2011, Estes et al. 2011, Schmitz et al. 2014, Flower and  
53 Gonzalez-Meler 2015, Lund et al. 2017). To date, many studies have demonstrated the role  
54 of large grazers and their predators in controlling primary productivity (e.g. Zimov et al.  
55 2009, Estes et al. 2011, Schmitz et al. 2014, Wilmers and Schmitz 2016) or insect outbreaks  
56 in causing defoliation and tree mortality (Kurz et al. 2008, Clark et al. 2010, Amiro et al.  
57 2010, Edburg et al. 2012, Flower et al. 2013, Flower and Gonzalez-Meler 2015). Under  
58 outbreak densities, the effects of insect herbivores on forest carbon cycling can be large  
59 enough to shift the ecosystem from being a carbon sink into a carbon source (Kurz et al.  
60 2008, Heliasz et al. 2011, Lund et al. 2017).

61 However, the role of non-outbreak, low-density populations of insect herbivores on  
62 carbon cycling has received less attention. The ubiquity of insect herbivory in terrestrial  
63 ecosystems (Strong et al. 1984, Schoonhoven et al. 2005, Forister et al. 2015), and its  
64 potential effects on the rates of photosynthesis and respiration of the remaining plant tissue  
65 (Nykänen and Koricheva 2004, Nabity et al. 2009, Bilgin et al. 2010) suggest that even low  
66 densities of insect herbivores could have a large impact on ecosystem carbon sequestration  
67 and loss (Strickland et al. 2013, Visakorpi et al. 2018).

68 Although insect herbivory has been shown to affect rates of photosynthesis and plant  
69 respiration beyond leaf area loss (“indirect effect of herbivory”, as opposed to “direct effect”  
70 of leaf area loss; Oleksyn et al. 1998, Zangerl et al. 2002, Nykänen and Koricheva 2004,  
71 Nabity et al. 2009, Bilgin et al. 2010, Meza-Canales et al. 2017), these physiological plant  
72 responses to herbivory have generally been neglected when estimating changes in ecosystem  
73 CO<sub>2</sub> exchange. Consequently, we currently do not have a clear picture how the most typical

74 levels of insect herbivory affect ecosystem CO<sub>2</sub> exchange. Ignoring the effects of insect  
75 herbivory could lead to biased estimations of ecosystem productivity, or of the role of forests  
76 as carbon sinks (Kurz et al. 2008, Campioli et al. 2016).

77 In this study, we quantify the effects of insect herbivory on forest-level net primary  
78 productivity in a temperate maritime woodland in southern England, UK. In a previous study  
79 in this system (Visakorpi et al. 2018), we found that photosynthesis of oak (*Quercus robur*,  
80 L.) was substantially lower in leaves subjected to herbivory by winter moth (*Operophtera*  
81 *brumata*, L.) caterpillars than in intact leaves surrounded only by other intact leaves.  
82 Moreover, a similar reduction in photosynthetic rate was seen in intact leaves on the same  
83 shoots as the damaged leaves, resulting in an estimated 50% reduction in canopy-level  
84 photosynthesis. How these changes in carbon assimilation affect tree and stand level  
85 productivity remains unknown. Here, we combine our previous measurements of herbivory-  
86 inflicted leaf area loss and indirect changes in photosynthetic rate (Visakorpi et al. 2018) with  
87 measurements on canopy and woody respiration, hourly meteorological data and tree survey  
88 data from the study site to estimate the effects of herbivory on oak primary production over a  
89 growing season (Figure 1). We ask: 1) what is the potential effect of insect herbivory on net  
90 primary production (NPP) of an oak stand, estimated separately through leaf area loss and  
91 through changes in canopy gas exchange and 2) how does the effect of herbivory on forest  
92 productivity change with changing herbivory pressure?

93

## 94 **Methods**

### 95 *Study site and system*

96 All data were collected in Wytham Woods (51°47' N, 1° 20' W, 160 m.a.s.l), located in  
97 Oxfordshire, UK. Wytham Woods is an ancient semi-natural woodland of 390 ha. Most parts  
98 of the woodland have experienced long-standing management practices (e.g. coppicing,

99 selective logging) until 50 year ago (Savill 2011). Recruitment is low, and established  
100 vegetation accounts for most of the carbon uptake (Thomas et al. 2011). The area within  
101 Wytham Woods in which our study took place has been a woodland at least since the 18<sup>th</sup>  
102 century, and most likely since the last ice age (Savill 2011).

103 Our focal study area is an 18-ha forest dynamics monitoring plot, part of the  
104 Smithsonian Global Earth Observatory network ([www.forestgeo.si.edu](http://www.forestgeo.si.edu)). The plot is  
105 dominated by sycamore (*Acer pseudoplatanus*, ca. 50% of the basal area), pedunculate oak  
106 (*Quercus robur*, ca. 20% of the basal area) and ash (*Fraxinus excelsior*, ca. 20% of the basal  
107 area; Butt et al. 2009, Savill 2011). The plot was surveyed for tree growth, recruitment and  
108 mortality in 2008, 2010 and 2016. The carbon cycle of the plot has been measured using the  
109 eddy covariance technique (Thomas et al. 2011) and biometric quantification of leaf and  
110 woody biomass in a 1 ha subplot (Fenn et al. 2015, Table 1). Previous work at the site has  
111 revealed seasonal dynamics in oak photosynthesis, which peaks on average 63 ( $\pm$  6) days  
112 after budburst (Morecroft et al. 2003).

113 In Wytham Woods, lepidopterous caterpillars are the first herbivores to attack the  
114 newly flushed leaves of most tree species (Feeny 1970). They emerge in synchrony with the  
115 budburst, and feed until early June (Hunter 1992). Relatively few herbivore species feed on  
116 the mature leaves later in the season (Feeny 1970). Of the early-spring herbivores, the winter  
117 moth (*Operophtera brumata*) is one of the most common species (Feeny 1970), feeding on  
118 most of the trees in the area. The winter moth is native to the area, and its population reaches  
119 outbreak densities approximately every 10 years. The last high abundance year prior to our  
120 study was in 2010 (285 caterpillars per m<sup>2</sup> of oak canopy, Lionel Cole; unpublished data).  
121 Since 2013, the population size has been small (e.g. 5 caterpillars per m<sup>2</sup> in 2014; Lionel  
122 Cole, unpublished data).

123

124 *Quantifying leaf area loss and the effect of insect herbivory on leaf-level photosynthesis*

125 Data on leaf area loss were collected from leaves in the upper canopy of five mature oak trees  
126 located in the 18-ha plot, accessible from a canopy platform. To estimate the level of insect  
127 herbivory on the five focal oaks throughout the growing season, we used estimates of the  
128 proportion of leaf area loss and the frequency distributions of three different leaf types per  
129 tree: completely intact leaves on shoots with only intact leaves (“completely intact”), intact  
130 leaves on shoots with at least one herbivore-damaged leaf (“systemically affected”), and  
131 leaves damaged by herbivores (“damaged”) (Visakorpi et al. 2018). Data on the effect of  
132 winter moth caterpillars on leaf-level photosynthesis were obtained from the manipulative  
133 experiment reported in Visakorpi et al. (2018). In brief, we introduced winter moth  
134 caterpillars on selected oak shoots, and subsequently measured light-photosynthesis response  
135 curves on three leaf types (intact, systemically affected, damaged). To estimate the amount of  
136 carbon lost through the consumed leaf tissue, we used estimates for leaf mass per area  
137 (“LMA”,  $\text{gm}^{-2}$ ) and leaf carbon content (% of dry mass) for the same leaf types from the  
138 same experiment (Visakorpi et al. 2020; Appendix 2, Table S3).

139

140 *Estimating oak NPP.* Figure 1 summarizes our approach and Appendix 1 provides more  
141 detail on the methodology. In brief, we used three methods to estimate oak NPP. First, NPP  
142 was estimated as the difference between canopy net photosynthesis and woody (stem + root)  
143 respiration (“*NPP through canopy upscaling*”). Second, we used census data on woody  
144 growth and combined these data with allometric equations to estimate leaf production and  
145 belowground production (“*NPP through tree growth census*”). Third, we used earlier  
146 estimates of oak above- and belowground NPP at the site obtained from biometric  
147 measurements (“*NPP through biometric measurements*”) (Fenn 2010, Fenn et al. 2015). For  
148 each of the three methods, we estimate oak NPP for a hypothetical stand comprising only of

149 mature oak trees, assigning the total basal area ( $33 \text{ m}^2 \text{ ha}^{-1}$ ) of trees at the site to oaks only,  
150 and for the actual per ha of oak of the site (oak basal area  $6.7 \text{ m}^2 \text{ ha}^{-1}$ ). For each case, we  
151 estimate oak NPP for two scenarios: 1) for an intact canopy (hereafter “*Intact canopy*”) and  
152 2) for a canopy under the observed level of herbivory (“*Normal herbivory*”). The effect of  
153 insect herbivory on NPP is the difference in NPP between the *Intact canopy* and the *Normal*  
154 *canopy* scenarios.

155 *NPP through canopy upscaling:* We used photosynthesis-light response curves  
156 measured from completely intact, systemically affected and damaged leaves from the five  
157 focal oak trees (one per leaf per leaf type per tree, Table 1). The leaf-level measures were  
158 scaled up with the Big Leaf approach of The Joint UK Land Environment Simulator  
159 (“JULES”, Clark et al. 2011). The canopy assimilation model included estimates for  
160 photosynthetic rate and daytime respiration rate (i.e. net photosynthesis) scaled to changes in  
161 LAI through the canopy, while taking into account leaf area loss to herbivory and the  
162 frequency distributions of the three different leaf types. Light was assumed to be reduced  
163 through the canopy layers (Monsi and Saeki 1953), photosynthesis to respond to light  
164 according to the light-photosynthesis response curves, and increased light to inhibit  
165 respiration (Mercado et al. 2007). To estimate night-time respiration, we measured respiration  
166 rates on the three leaf types on each of our five focal trees during two nights in July 2015. To  
167 scale night respiration to canopy level, we accounted for the frequency distributions of  
168 different leaf types and corrected for differences in respiration rates between different canopy  
169 layers (Griffin et al. 2001). Canopy gas exchange (daytime net photosynthesis – night  
170 respiration) was scaled to hourly light (daytime net photosynthesis) and temperature (night  
171 respiration) data, to seasonal changes in LAI (Stokes 2000, Fenn 2010) and to seasonal  
172 changes in photosynthetic rate of oak (Morecroft et al. 2003). The canopy night respiration  
173 rate was further scaled with the daytime photosynthetic rate of the previous day (Whitehead

174 et al. 2004). To estimate woody respiration, we used data from previous measurements of oak  
175 stem respiration at the site (Walker 2017). We assumed that stem respiration followed the  
176 same pattern as leaf respiration in response to herbivory, since both leaf and stem respiration  
177 rates have a similar, positive relationship with photosynthesis (Wertin and Teskey 2008).  
178 Stem respiration was scaled to hourly temperature data. Root respiration was assumed to be  
179 13% of stem respiration, based on earlier measurements at the site (Fenn et al. 2015). Canopy  
180 gas exchange and woody respiration were scaled to plot level by assuming leaf area index  
181 (“LAI”) of  $6.5 \text{ m}^2/\text{m}^2$  and stem area index (“SAI”) of  $1.5 \text{ m}^2/\text{m}^2$ , both previously estimated  
182 for the site (Fenn 2010, Nils Rutjes 2016, unpublished data; Fenn and others 2015, Table 1).  
183 For all meteorological data, we used hourly data recorded at an open site in Wytham Woods  
184 during years 2014 and 2015 (Figure 2, Rennie et al. 2017).

185 *NPP through tree growth census:* We used dbh measurements from all oak trees (355  
186 stems, >10 cm dbh) within the 18 ha forest dynamics plot obtained from censuses in 2010  
187 and 2016 (Y. Malhi, unpublished analysis). We estimated the yearly growth as an increase in  
188 aboveground woody biomass divided by the length of the census interval. To estimate woody  
189 NPP we multiplied the estimated change in woody biomass by the carbon content of oak  
190 wood (0.47; Butt et al. 2009). We then used oak-specific NPP allocation patterns obtained  
191 from (Fenn 2010) to estimate oak leaf NPP and belowground NPP (Appendix 1, Table S2).  
192 To estimate the effect of herbivory on oak NPP, we estimated NPP in the absence of  
193 herbivory assuming that the total NPP under normal herbivory situation was reduced to the  
194 same extent (ca. 56%, Appendix 1, Table S2) as canopy gas exchange in the canopy  
195 upscaling calculations described above. We then extrapolated the values per tree to estimates  
196 per hectare of a plot with only oak trees, and per hectare of the actual study site.

197 *NPP through biometric measurements:* We combined data on aboveground oak NPP  
198 collected in a one hectare subplot of the 18 ha forest dynamics plot with information on the



199 oak-specific ratios of wood NPP to leaf NPP and aboveground biomass to belowground  
200 biomass (Fenn 2010; Fenn et al. 2015; see Appendix 1, Table S2). The biometric estimates  
201 were based on dendrometer measurements (woody production), measures of leaf production  
202 (litter traps) and of root production (soil respiration and inputs). We combined these  
203 relationships for an estimate of whole oak NPP as Mg C yr<sup>-1</sup> per ha of the actual study site.  
204 To estimate the effect of herbivory on oak NPP, we again assumed that the total NPP was  
205 reduced to the same extent as canopy gas exchange in the canopy upscaling calculations  
206 above.

207

208 *Predicting the effects of herbivory on canopy assimilation under varying levels of herbivory*

209 To predict the effect of herbivory on oak assimilation under different levels of caterpillar  
210 herbivory, we first simulated changes in the proportions of the three different leaf types  
211 (intact, systemically affected, damaged) in the oak canopy. We assumed that the ratio of  
212 damaged leaves to systemically affected leaves (1:2.3) and leaf area loss per damaged leaf  
213 (8.53%) stay at the same levels as observed in our herbivory surveys until all shoots have at  
214 least one damaged leaf. After this, the proportion of damaged leaves was set to increase until  
215 all leaves were damaged. Finally, we set the proportion of leaf area loss per leaf to increase,  
216 until the tree was completely defoliated. In other words, we assumed that the herbivory first  
217 spreads evenly to all shoots, then to all leaves, and then increases per leaf. LAI was assumed  
218 to decrease as leaf area loss increased, increasing the amount of light reaching lower canopy  
219 levels (Figure S7, Appendix 2). We assumed a linear relationship between winter moth  
220 caterpillar density and leaf area loss, with 5 individuals m<sup>-2</sup> in 2015 (Lionel Cole,  
221 unpublished data) corresponding to 5.9% leaf area loss (across the canopy) and to peak-  
222 season LAI of 6.5, and maximum reported density of 1200 individuals m<sup>-2</sup> corresponding to  
223 complete defoliation (Feeny 1970). We then estimated daytime canopy net photosynthesis

224 with herbivory levels ranging from 0% to 100% leaf area loss. To test how sensitive the  
225 estimated relationship between the level of herbivory and its effect on canopy assimilation  
226 was to the assumptions of our models, we estimated the same relationship under four  
227 alternative scenarios: 1) the difference in photosynthetic rate between intact and damaged  
228 leaves is smaller than our field measurements suggest, 2) the photosynthetic rate of intact  
229 leaves increases with increasing level of herbivory in the canopy, 3) herbivory spreads  
230 through the canopy following a different spatial pattern than in our initial assumptions and 4)  
231 a second leaf flush compensates for some of the leaf area loss. For details, see Appendix 3.

232

### 233 **Results and discussion**

234 We estimate that insect herbivores remove on average  $0.12 (\pm 0.02)$  Mg C ha yr<sup>-1</sup> in an oak  
235 stand through leaf area loss. Through reducing photosynthesizing leaf area and the  
236 photosynthetic rate of intact leaf tissue, insect herbivores prevent between  $8.5 (\pm 5.1, \text{canopy}$   
237  $\text{upscaling})$  and  $4.1 (\pm 2.1, \text{tree census})$  Mg C ha<sup>-1</sup> yr<sup>-1</sup> of carbon from being assimilated  
238 (Figure 2 and 3; Appendix 2, Figure S5). Depending on the method, we estimate the NPP of a  
239 forest consisting of only mature oak trees to be between  $3.4 (\pm 0.6; \text{biometric measurements})$   
240 and  $4.6 (\pm 1.1; \text{tree census})$  Mg C ha<sup>-1</sup> yr<sup>-1</sup> under the observed level of herbivory (5.9% leaf  
241 area loss, Table 2, Figure 3). This is between  $54 \pm 21\%$  to  $69 \pm 42\%$  lower than the NPP of a  
242 completely intact canopy (Table 2). While previous studies (Kurz et al. 2008, Clark et al.  
243 2010, Schäfer et al. 2010, Heliasz et al. 2011, Metcalfe et al. 2014, Lund et al. 2017) have  
244 shown that herbivore outbreaks can result in a considerable loss of carbon from the  
245 ecosystem, our study suggests that insect herbivores can have a large impact on the forest  
246 primary productivity even at a low density.

247 We suggest that the relationship between the intensity of herbivory and its effect on  
248 ecosystem productivity is non-linear and described by two stages: first, a rapid, linear

249 increase in the effect of herbivory due to the spread of systemic effects in the canopy  
250 (suppression of photosynthesis), and second, a slower non-linear increase with increasing leaf  
251 area loss (Figure 4). Starting with a completely intact canopy, as the level of herbivory  
252 increases, the proportion of intact, unaffected leaves decreases until the level of ca. 5%  
253 herbivory (Appendix 2, Figure S6a). At this point, all shoots are likely to have at least one  
254 damaged leaf, and consequently all leaves would be affected by herbivory (either directly or  
255 through systemic effects). After this point, further changes in canopy photosynthesis are  
256 caused entirely by the direct effects of leaf area loss (Appendix 2, Figure S6cd). Assuming  
257 that the photosynthetic rate of intact leaves increases with herbivory for example as a  
258 compensatory response (Thomson et al. 2003, Retuerto et al. 2004), or that part of the  
259 missing leaf area is compensated through a second leaf flush reduces the magnitude of these  
260 estimates, but not the shape of the relationship (Appendix 3).

261 Our study illustrates the potential magnitude of the effect of insect herbivores on  
262 forest carbon cycling. Nevertheless, our estimates are based on the upscaling of leaf-level  
263 measurements and on allometric relationships, rather than on direct measurements of  
264 canopies and forest stands with and without herbivory. Below, we compare our results to  
265 previous estimates of the effects of herbivores on forest NPP. We discuss the limitations of  
266 our models and the discrepancies between our simulation and the real-world effects of  
267 herbivores on ecosystem productivity.

268

269 *Previous estimates of the effects of insect herbivores on carbon cycling.* The estimates of oak  
270 forest NPP under ambient herbivory levels derived through the three different methods  
271 (canopy upscaling, tree census and biometric measurements; Table 2) were similar to one  
272 another, and agree with previous estimates of NPP at the site (Fenn et al. 2015) and at other  
273 oak-dominated temperate forests (e.g. Whitehead et al. 2004; Schäfer et al. 2010). The

274 observed leaf area loss was 5.9 %, which is close to the reported global average for forests  
275 (5%; Cebrian 1999, 2004). We estimated that canopy gas exchange was reduced by 54%, and  
276 whole tree NPP by 54-69% due to herbivory, depending on the estimation method. These  
277 values are similar to previously published results: based on observed changes in sap flow and  
278 canopy modelling, Schäfer et al. (2010) estimated that a gypsy moth outbreak reduced  
279 canopy assimilation of an oak/pine forest by 24%. Focusing on the same outbreak, Clark et  
280 al. (2010) estimated on average 55% reduction in net ecosystem CO<sub>2</sub> exchange using eddy  
281 covariance and biometric measurements (Table 3). In line with our simulations, (Flower and  
282 Gonzalez-Meler 2015) showed in a meta-analysis how the relationship between pest outbreak  
283 intensity and its effect on forest NPP was sigmoidal rather than linear, though the effects of  
284 pests were evident only after at least 30% of the basal area was affected. Comparing an  
285 outbreak year to a typical (non-outbreak) level of herbivory is likely to yield different results  
286 from the kind of comparison made in our study: even in years of low herbivore density, forest  
287 canopies experience some herbivory (Cebrian 1999, 2004). Since the indirect suppression of  
288 photosynthesis in intact plant tissue was the biggest driver of the effect of herbivory on NPP,  
289 comparing a plant experiencing a low level of herbivory to a completely intact plant might  
290 reveal a larger effect of herbivory than comparing a normal level of herbivory to an outbreak  
291 level (Figure 4).

292 In our study, the largest effect of herbivory on NPP (69%) was estimated through the  
293 canopy upscaling approach. This is most likely because stem and root respiration were  
294 assumed to respond to herbivory similarly to leaf respiration, and because the difference  
295 between the two scenarios (intact and with herbivory) was smaller for leaf respiration than for  
296 photosynthesis. One of the biggest uncertainties in our calculations is how woody respiration  
297 responds to leaf herbivory. This is a clear knowledge gap that needs to be addressed in future  
298 studies. Had we assumed that a change in photosynthesis would not result in a change in stem

299 respiration, or that stem respiration would increase after herbivory, our estimate for the effect  
300 of herbivory on oak NPP would have been even larger. Thus, our current assumptions on the  
301 response of woody respiration to herbivory provide a more conservative estimate on the  
302 effect of herbivory on forest NPP than if we had assumed constant stem respiration or an  
303 increased respiration after herbivory.

304

305 *The effect of increasing herbivory pressure on forest productivity.* Our estimate of the effect  
306 of herbivores on oak NPP is based on data from a year with a low winter moth population  
307 density. Previous reports of winter moth outbreaks in Wytham Woods include records of  
308 complete defoliation of trees (Feeny 1970). Intuitively, we might expect increasing herbivory  
309 pressure to have a linearly increasing effect on ecosystem productivity. Nevertheless, the  
310 herbivore-induced changes in leaf gas exchange per unit leaf area of the remaining leaf tissue  
311 appear not to depend on the amount of damage per leaf (Visakorpi et al. 2018), and the vast  
312 majority of leaves show some signs of feeding damage even under low herbivore densities.  
313 Thus, increased herbivore densities would likely not further affect the leaf gas exchange in  
314 the remaining tissue. Consequently, we predict that increases in herbivore densities above  
315 those observed in our study are unlikely to result in large changes in the magnitude of the  
316 effect of herbivory on ecosystem NPP, except in outbreak years with very high proportion of  
317 leaf area loss (e.g. 75% or more, Figure 4). If the systemic plant responses observed in our  
318 system are widespread, many forests could be at a stage where a large part of the  
319 photosynthesizing plant tissue is already indirectly affected by herbivory. Consequently,  
320 observing large-scale herbivore-induced changes in ecosystem productivity in natural  
321 conditions might be restricted to situations with insect outbreaks.

322         The predicted magnitude of reduction in productivity caused by reduced  
323 photosynthesis is large, and we recognise that this prediction needs explicit testing. There are

324 several additional factors that might change how herbivory affects ecosystem productivity  
325 which have not been considered in our predictions. First, the reduced leaf area caused by  
326 herbivory could increase light penetration to lower canopy layers (Anten and Ackerly 2001)  
327 and increase canopy light use efficiency (Gough et al. 2013). The effect of increased light  
328 penetration might compensate for some of the loss of leaf tissue (e.g. 5-30% according to  
329 Anten and Ackerly, 2001). Even though our assimilation model accounts for light diffusion  
330 through the canopy, and our simulations assume that LAI changes with herbivory (Appendix  
331 2, Figure S7), a more detailed canopy model taking into account sunlit and shaded areas  
332 could simulate the effects of increased light more accurately (Clark et al. 2011). Our model  
333 also assumes that efficiency at which canopy intercepts light (i.e. the light extinction  
334 coefficient, see Equation 1 in Appendix 1) is constant, which is most likely unrealistic.  
335 Furthermore, how herbivory is distributed between canopy layers is currently unknown, but  
336 could affect how much light reaches the lower leaves. Estimating light interception in relation  
337 to herbivory-induced changes in LAI and patterns of herbivory within canopies would allow  
338 better quantification of the effects of increased light at lower canopy layers.

339         Second, increased herbivory is likely to result in increased deposits of frass, insect  
340 tissue, leaf fragments ('greenfall') and nutrient leaching from damaged leaves  
341 ("throughfall"). Herbivore-induced reduction in tree growth could also reduce competition  
342 experienced by the surrounding vegetation. The increased nutrient cycling and competitive  
343 release could increase forest productivity and compensate for the loss of carbon to herbivory  
344 (Gough et al. 2013, Lund et al. 2017, Costilow et al. 2017). Third, increased leaf herbivory  
345 might increase carbon allocation to roots (Dyer et al. 1991), which might increase root  
346 productivity and root and soil respiration (Holland et al. 1996). Fourth, the total litterfall  
347 might remain unchanged even after severe defoliation due to compensating second leaf  
348 flushes (Grace 1986, Clark et al. 2010). If the second leaf flush ("lammas shoots" on oak)

349 produces more leaves as a response to early-season herbivory, or if these new leaves  
350 photosynthesize at a higher rate, they might compensate for the effects of herbivory on the  
351 canopy gas exchange. Lastly, insect feeding can increase transport of photosynthetic end-  
352 products away from certain leaves, and thereby reduce the negative effects of herbivory on  
353 photosynthesis (Retuerto et al. 2004, Schwachtje and Baldwin 2008). These types of sink-  
354 source dynamics might change the distribution of photosynthetic efficiency within the  
355 canopy. The higher photosynthetic rate of intact leaves could thus be a compensatory  
356 response to herbivory (see e.g. Thomson et al. 2003, Retuerto et al. 2004).

357         We simulated the relationship between the effect of herbivory on canopy assimilation  
358 and the intensity of herbivory assuming compensatory photosynthesis and a second leaf flush.  
359 If photosynthesis of intact leaves increases with increasing level of herbivory (which could be  
360 assumed if the response was compensatory) the effect of herbivory on canopy assimilation  
361 would be lower than without the compensatory response, especially at low herbivore  
362 densities (e.g. 23% compared to 49% with 6% herbivory, Figure S8b in Appendix 3). A  
363 second leaf flush occurring 1<sup>st</sup> of August, compensating 50% of the leaf area loss, would on  
364 the other hand lower the estimate on the effect of herbivory at high herbivore densities: the  
365 effect of herbivory would never exceed 75% (Figure S8d in Appendix 3). Compensatory  
366 plant responses are likely to be important in reducing the impact of herbivory on forest  
367 productivity, but their exact effect depends on the compensating mechanism. Quantifying the  
368 compensatory plant responses to herbivory and the photosynthetic rate of lammas leaves  
369 would be important topics for future studies in this system.

370

371 *The effect of decreasing herbivory pressure on forest productivity.* Our results indicate that  
372 the lower the herbivory rate, the more important the indirect effects of herbivory on  
373 photosynthesis. When only a small part of the canopy is affected by herbivores, even small

374 increases in herbivory could cause a large change in the canopy photosynthesis through the  
375 disproportionate decrease in the number of intact leaves (herbivory on a single leaf will  
376 trigger systemic effects on all leaves within that shoot). For example, in a study by (Zvereva  
377 et al. 2012), a small increase in low intensity herbivory (from 1% to 3% leaf area loss) in  
378 mountain birch (*Betula pubescens* subsp. *czerepanovii*) resulted in a much larger (30%)  
379 reduction in plant growth. Nevertheless, since our study represents a year with a relatively  
380 low herbivore density, situations of even lower levels of herbivory and the rapid changes in  
381 productivity might be rare in natural conditions.

382         Predicting the effects of reduced levels of early-season herbivory on forest carbon  
383 cycling is not straightforward. Reduced densities of herbivores early in the season could  
384 result in altered investments in plant defences and change the level of herbivory experienced  
385 by the host plant at a later point (Agrawal 2000, Poelman et al. 2008). Changes in the  
386 frequency of insect herbivory could also change the susceptibility to plant pathogens (Felton  
387 and Korth 2000, De Vos et al. 2006), which could decrease leaf photosynthesis (Copolovici  
388 et al. 2014). How the interplay between different plant enemies affects carbon sequestration  
389 and cycling is currently unknown.

390         The seasonal changes in oak photosynthesis in our study system (Morecroft et al.  
391 2003) might depend on early-season herbivore densities. The slow onset and the late peak of  
392 oak photosynthesis could be a strategy to avoid losing photosynthesised sugars to early-  
393 season caterpillars and could be driven by phenotypic plasticity in the responses to the  
394 intensity of early-season herbivores. The oak photosynthesis could develop faster when the  
395 spring-feeding caterpillars occur at low density compared to a high-density year, changing  
396 the amount of carbon sequestered over the season.

397



398 *The fate of carbon contained in the leaf area lost to herbivory.* Previous studies on the  
399 patterns of leaf area loss and insect energetics allows us to estimate the pathways of carbon  
400 once it is removed from the canopy. Based on previous studies on the amounts of greenfall  
401 (falling leaf fragments due to herbivore feeding), roughly 75% of the lost leaf area is ingested  
402 by the caterpillars (Russell et al. 2004). Of the ingested carbon, approximately 15% will be  
403 respired, 60% will be turned into frass and transported into the soil, and the rest will turn into  
404 insect tissue (of lepidopteran caterpillars; Wiegert and Petersen 1983). Based on estimated  
405 predation rates of winter moth caterpillars and cadavers, most of this insect tissue will be  
406 eaten by predators (East 1974). Thus, we estimate that 18% of the carbon contained in the  
407 observed leaf area lost to herbivory ( $0.02 \text{ Mg C ha}^{-1} \text{ yr}^{-1}$ ) is likely to be transferred to higher  
408 trophic levels in this system, and 70% of the leaf area loss ( $0.08 \text{ Mg C ha}^{-1} \text{ yr}^{-1}$ ) is directly  
409 deposited in the soil, partly as greenfall and partly as frass (Figure 5). Data on the amount of  
410 plant biomass consumed by herbivores have been collected for several ecosystems (Cebrian  
411 2004). By using similar calculations here, it could be possible to estimate herbivore-mediated  
412 carbon fluxes to soil or higher trophic levels for a wide variety of ecosystems (see e.g.  
413 Metcalfe and others 2014).

414

#### 415 *Conclusions*

416 We propose that insect herbivores can, even at low densities, have a large effect on  
417 ecosystem NPP in a temperate deciduous forest, mainly through indirect changes in the rates  
418 of canopy gas exchange. Most forest ecosystems might naturally be in a state where  
419 photosynthesis is substantially reduced by the effects of herbivory, in particular by the  
420 indirect effects. The relationship between the intensity of herbivory and its effects on the host  
421 plant is most likely non-linear. At low herbivore densities, the effect of herbivory on NPP is  
422 primarily driven by changes in leaf gas exchange in the remaining leaf tissue, while the

423 contribution of leaf area loss increases with increasing herbivore abundances. We predict that  
424 comparisons of productivity between completely intact plants and plants with even a small  
425 amount of herbivory-inflicted damage are likely to yield large estimates on the effects of  
426 herbivory on plant productivity. On the other hand, comparisons between plants experiencing  
427 low (but non-zero) and high levels of herbivory are likely to result in lower estimates on the  
428 effect of herbivory. The presence of compensatory plant responses, like increased  
429 photosynthesis or additional leaf flushes will likely reduce the impact of herbivory, the exact  
430 effect depending on the compensating mechanism. Further and more detailed studies  
431 including different study systems and species are needed to validate whether the proposed  
432 relationship between intensity of herbivory and its effect on plant productivity holds. Where  
433 there is strong interannual variability in herbivory, ecosystem measurements of productivity,  
434 such as eddy covariance approaches (Thomas et al. 2011) or detailed estimates on tree growth  
435 (Varley and Gradwell 1962, Whittaker and Warrington 1985, Zvereva et al. 2012) could be  
436 coupled with herbivory measurements to test this relationship. The distributions and  
437 abundances of insect herbivores are likely to change in the future (Ayres and Lombardero  
438 2000, Jepsen et al. 2008, Kurz et al. 2008), with increasing temperature (Bale et al. 2002),  
439 CO<sub>2</sub> concentration (Stiling et al. 2009), drought (Gaylord et al. 2013) and advancing  
440 phenology (Charmantier et al. 2008) affecting the intensity of herbivory differently.  
441 Quantifying the effect of insect herbivores carbon cycling is therefore an intriguing and  
442 important avenue of research.

443

#### 444 **Acknowledgements**

445 We thank Lionel Cole for providing data on winter moth abundances, Alexander Shenkin and  
446 Kieran Walker for the stem respiration data and the Journal Club of the Ecosystems lab and  
447 three anonymous reviewers for helpful comments on the text. KV was funded by Osk.

448 Huttunen Foundation and Finnish Cultural Foundation. SG is a Royal Society University  
449 Research Fellow. YM was supported by the Jackson Foundation and by a European Research  
450 Council Advanced Investigator Grant (GEM-TRAIT: 321131).

451

## 452 **References**

- 453 Agrawal, A. A. 2000. Specificity of induced resistance in wild radish: causes and  
454 consequences for two specialist and two generalist caterpillars. *Oikos* 89:493–500.
- 455 Amiro, B. D., A. G. Barr, J. G. Barr, T. A. Black, R. Bracho, M. Brown, J. Chen, K. L. Clark,  
456 K. J. Davis, A. R. Desai, S. Dore, V. Engel, J. D. Fuentes, A. H. Goldstein, M. L.  
457 Goulden, T. E. Kolb, M. B. Lavigne, B. E. Law, H. A. Margolis, T. Martin, J. H.  
458 McCaughey, L. Misson, M. Montes-Helu, A. Noormets, J. T. Randerson, G. Starr,  
459 and J. Xiao. 2010. Ecosystem carbon dioxide fluxes after disturbance in forests of  
460 North America. *Journal of Geophysical Research* 115:G00K02.
- 461 Anten, N. P. R., and D. D. Ackerly. 2001. Canopy-level photosynthetic compensation after  
462 defoliation in a tropical understorey palm. *Functional Ecology* 15.
- 463 Ayres, M. P., and M. J. Lombardero. 2000. Assessing the consequences of global change for  
464 forest disturbance from herbivores and pathogens. *Science of The Total Environment*  
465 262:263–286.
- 466 Bale, J. S., G. J. Masters, I. D. Hodkinson, C. Awmack, T. M. Bezemer, V. K. Brown, J.  
467 Butterfield, A. Buse, J. C. Coulson, J. Farrar, J. E. G. Good, R. Harrington, S. Hartley,  
468 T. H. Jones, R. L. Lindroth, M. C. Press, I. Symrnioudis, A. D. Watt, and J. B.  
469 Whittaker. 2002. Herbivory in global climate change research: direct effects of rising  
470 temperature on insect herbivores. *Global Change Biology* 8:1–16.

- 471 Bilgin, D. D., J. A. Zavala, J. Zhu, S. J. Clough, D. R. Ort, and E. H. DeLucia. 2010. Biotic  
472 stress globally downregulates photosynthesis genes. *Plant, Cell & Environment*  
473 33:1597–1613.
- 474 Butt, N., G. Campbell, Y. Malhi, M. Morecroft, K. Fenn, and M. Thomas. 2009. Initial  
475 results from establishment of a long-term broadleaf monitoring plot at Wytham  
476 Woods, Oxford, UK. University of Oxford, Oxford.
- 477 Campioli, M., Y. Malhi, S. Vicca, S. Luysaert, D. Papale, J. Peñuelas, M. Reichstein, M.  
478 Migliavacca, M. A. Arain, and I. A. Janssens. 2016. Evaluating the convergence  
479 between eddy-covariance and biometric methods for assessing carbon budgets of  
480 forests. *Nature Communications* 7:13717.
- 481 Cebrian, J. 1999. Patterns in the fate of production in plant communities. *The American*  
482 *Naturalist* 154:449–468.
- 483 Cebrian, J. 2004. Role of first-order consumers in ecosystem carbon flow. *Ecology Letters*  
484 7:232–240.
- 485 Chapin, F. S. 1997. Biotic Control over the Functioning of Ecosystems. *Science* 277:500–  
486 504.
- 487 Charmantier, A., R. H. McCleery, L. R. Cole, C. Perrins, L. E. B. Kruuk, and B. C. Sheldon.  
488 2008. Adaptive phenotypic plasticity in response to climate change in a wild bird  
489 population. *Science* 320:800–803.
- 490 Clark, D. B., L. M. Mercado, S. Sitch, C. D. Jones, N. Gedney, M. J. Best, M. Pryor, G. G.  
491 Rooney, R. L. H. Essery, E. Blyth, O. Boucher, R. J. Harding, C. Huntingford, and P.  
492 M. Cox. 2011. The Joint UK Land Environment Simulator (JULES), model  
493 description – Part 2: Carbon fluxes and vegetation dynamics. *Geoscientific Model*  
494 *Development* 4:701–722.

- 495 Clark, K. L., N. Skowronski, and J. Hom. 2010. Invasive insects impact forest carbon  
496 dynamics: defoliation and forest carbon dynamics. *Global Change Biology* 16:88–  
497 101.
- 498 Copolovici, L., F. Vaartnou, M. P. Estrada, and U. Niinemets. 2014. Oak powdery mildew  
499 (*Erysiphe alphitoides*)-induced volatile emissions scale with the degree of infection in  
500 *Quercus robur*. *Tree Physiology* 34:1399–1410.
- 501 Costilow, K. C., K. S. Knight, and C. E. Flower. 2017. Disturbance severity and canopy  
502 position control the radial growth response of maple trees (*Acer* spp.) in forests of  
503 northwest Ohio impacted by emerald ash borer (*Agrilus planipennis*). *Annals of*  
504 *Forest Science* 74:10.
- 505 De Vos, M., W. van Zaalen, A. Koornneef, J. P. Korzelius, M. Dicke, L. C. Van Loon, and C.  
506 M. J. Pieterse. 2006. Herbivore-induced resistance against microbial pathogens in  
507 *Arabidopsis*. *Plant Physiology* 142:352–363.
- 508 Dyer, M. I., M. A. Acra, G. M. Wang, D. C. Coleman, D. W. Freckman, S. J. McNaughton,  
509 and B. R. Strain. 1991. Source-sink carbon relations in two *Panicum coloratum*  
510 ecotypes in response to herbivory. *Ecology* 72:1472–1483.
- 511 East, R. 1974. Predation on the soil-dwelling stages of the winter moth at Wytham Woods,  
512 Berkshire. *The Journal of Animal Ecology* 43:611.
- 513 Edburg, S. L., J. A. Hicke, P. D. Brooks, E. G. Pendall, B. E. Ewers, U. Norton, D. Gochis, E.  
514 D. Gutmann, and A. J. Meddens. 2012. Cascading impacts of bark beetle-caused tree  
515 mortality on coupled biogeophysical and biogeochemical processes. *Frontiers in*  
516 *Ecology and the Environment* 10:416–424.
- 517 Estes, J. A., J. Terborgh, J. S. Brashares, M. E. Power, J. Berger, W. J. Bond, S. R. Carpenter,  
518 T. E. Essington, R. D. Holt, J. B. C. Jackson, R. J. Marquis, L. Oksanen, T. Oksanen,  
519 R. T. Paine, E. K. Pikitch, W. J. Ripple, S. A. Sandin, M. Scheffer, T. W. Schoener, J.

- 520 B. Shurin, A. R. E. Sinclair, M. E. Soulé, R. Virtanen, and D. A. Wardle. 2011.  
521 Trophic downgrading of planet Earth. *Science* 333:301–306.
- 522 Feeny, P. 1970. Seasonal changes in oak leaf tannins and nutrients as a cause of spring  
523 feeding by Winter moth caterpillars. *Ecology* 51:565–581.
- 524 Felton, G. W., and K. L. Korth. 2000. Trade-offs between pathogen and herbivore resistance.  
525 *Current Opinion in Plant Biology* 3:309–314.
- 526 Fenn, K. M. 2010. Carbon cycling in British deciduous woodland: processes, budgets,  
527 climate & phenology. DPhil, University of Oxford.
- 528 Fenn, K., Y. Malhi, M. Morecroft, C. Lloyd, and M. Thomas. 2015. The carbon cycle of a  
529 maritime ancient temperate broadleaved woodland at seasonal and annual scales.  
530 *Ecosystems* 18:1–15.
- 531 Flower, C. E., and M. A. Gonzalez-Meler. 2015. Responses of Temperate Forest Productivity  
532 to Insect and Pathogen Disturbances. *Annual Review of Plant Biology* 66:547–569.
- 533 Flower, C. E., K. S. Knight, and M. A. Gonzalez-Meler. 2013. Impacts of the emerald ash  
534 borer (*Agrilus planipennis* Fairmaire) induced ash (*Fraxinus* spp.) mortality on forest  
535 carbon cycling and successional dynamics in the eastern United States. *Biological*  
536 *Invasions* 15:931–944.
- 537 Forister, M. L., V. Novotny, A. K. Panorska, L. Baje, Y. Basset, P. T. Butterill, L. Cizek, P.  
538 D. Coley, F. Dem, I. R. Diniz, P. Drozd, M. Fox, A. E. Glassmire, R. Hazen, J. Hreck,  
539 J. P. Jahner, O. Kaman, T. J. Kozubowski, T. A. Kursar, O. T. Lewis, J. Lill, R. J.  
540 Marquis, S. E. Miller, H. C. Morais, M. Murakami, H. Nickel, N. A. Pardikes, R. E.  
541 Ricklefs, M. S. Singer, A. M. Smilanich, J. O. Stireman, S. Villamarín-Cortez, S.  
542 Vodka, M. Volf, D. L. Wagner, T. Walla, G. D. Weiblen, and L. A. Dyer. 2015. The  
543 global distribution of diet breadth in insect herbivores. *Proceedings of the National*  
544 *Academy of Sciences* 112:442–447.

- 545 Gaylord, M. L., T. E. Kolb, W. T. Pockman, J. A. Plaut, E. A. Yepez, A. K. Macalady, R. E.  
546 Pangle, and N. G. McDowell. 2013. Drought predisposes piñon-juniper woodlands to  
547 insect attacks and mortality. *New Phytologist* 198:567–578.
- 548 Gough, C. M., B. S. Hardiman, L. E. Nave, G. Bohrer, K. D. Maurer, C. S. Vogel, K. J.  
549 Nadelhoffer, and P. S. Curtis. 2013. Sustained carbon uptake and storage following  
550 moderate disturbance in a Great Lakes forest. *Ecological Applications* 23:1202–1215.
- 551 Grace, J. R. 1986. The influence of gypsy moth on the composition and nutrient content of  
552 litter fall in a pennsylvania oak forest. *Forest Science* 32:855–870.
- 553 Griffin, K. L., D. T. Tissue, M. H. Turnbull, W. Schuster, and D. Whitehead. 2001. Leaf dark  
554 respiration as a function of canopy position in *Nothofagus fusca* trees grown at  
555 ambient and elevated CO<sub>2</sub> partial pressures for 5 years. *Functional Ecology* 15:497–  
556 505.
- 557 Heliasz, M., T. Johansson, A. Lindroth, M. Mölder, M. Mastepanov, T. Friborg, T. V.  
558 Callaghan, and T. R. Christensen. 2011. Quantification of C uptake in subarctic birch  
559 forest after setback by an extreme insect outbreak: carbon uptake setback by insect  
560 outbreak. *Geophysical Research Letters* 38.
- 561 Holland, J. N., W. Cheng, and D. A. Crossley. 1996. Herbivore-induced changes in plant  
562 carbon allocation: assessment of below-ground C fluxes using carbon-14. *Oecologia*  
563 107:87–94.
- 564 Hunter, M. D. 1992. Interactions within herbivore communities mediated by the host plant:  
565 the keystone herbivore concept. Pages 287–325 *in* M. D. Hunter, T. Ohgushi, and P.  
566 W. Price, editors. *Effects of resource distribution on animal–plant interactions*.  
567 Academic Press, Inc., San Diego, California, USA.
- 568 Jepsen, J. U., S. B. Hagen, R. A. Ims, and N. G. Yoccoz. 2008. Climate change and outbreaks  
569 of the geometrids *Operophtera brumata* and *Epirrita autumnata* in subarctic birch

570 forest: evidence of a recent outbreak range expansion. *Journal of Animal Ecology*  
571 77:257–264.

572 Kurz, W. A., C. C. Dymond, G. Stinson, G. J. Rampley, E. T. Neilson, A. L. Carroll, T.  
573 Ebata, and L. Safranyik. 2008. Mountain pine beetle and forest carbon feedback to  
574 climate change. *Nature* 452:987–990.

575 Lund, M., K. Raundrup, A. Westergaard-Nielsen, E. López-Blanco, J. Nymand, and P.  
576 Aastrup. 2017. Larval outbreaks in West Greenland: Instant and subsequent effects on  
577 tundra ecosystem productivity and CO<sub>2</sub> exchange. *Ambio* 46:26–38.

578 Mercado, L. M., C. Huntingford, J. H. C. Gash, P. M. Cox, and V. Jogleddy. 2007.  
579 Improving the representation of radiation interception and photosynthesis for climate  
580 model applications. *Tellus B: Chemical and Physical Meteorology* 59:553–565.

581 Metcalfe, D. B., G. P. Asner, R. E. Martin, J. E. Silva Espejo, W. H. Huasco, F. F. Farfán  
582 Amézquita, L. Carranza-Jimenez, D. F. Galiano Cabrera, L. D. Baca, F. Sinca, L. P.  
583 Huaraca Quispe, I. A. Taype, L. E. Mora, A. R. Dávila, M. M. Solórzano, B. L. Puma  
584 Vilca, J. M. Laupa Román, P. C. Guerra Bustios, N. S. Revilla, R. Tupayachi, C. A. J.  
585 Girardin, C. E. Doughty, and Y. Malhi. 2014. Herbivory makes major contributions to  
586 ecosystem carbon and nutrient cycling in tropical forests. *Ecology Letters* 17:324–  
587 332.

588 Meza-Canales, I. D., S. Meldau, J. A. Zavala, and I. T. Baldwin. 2017. Herbivore perception  
589 decreases photosynthetic carbon assimilation and reduces stomatal conductance by  
590 engaging 12-oxo-phytodienoic acid, mitogen-activated protein kinase 4 and cytokinin  
591 perception. *Plant, Cell & Environment* 40:1039–1056.

592 Monsi, M., and T. Saeki. 1953. Ueber den Lichtfaktor in den Pflanzengesellschaften und seine  
593 Bedeutung fuer die Stoffproduktion. *Journal of Japanese Botany*:22–52.



- 594 Morecroft, M. D., V. J. Stokes, and J. I. L. Morison. 2003. Seasonal changes in the  
595 photosynthetic capacity of canopy oak (*Quercus robur*) leaves: the impact of slow  
596 development on annual carbon uptake. *International Journal of Biometeorology*  
597 47:221–226.
- 598 Nability, P. D., J. A. Zavala, and E. H. DeLucia. 2009. Indirect suppression of photosynthesis  
599 on individual leaves by arthropod herbivory. *Annals of Botany* 103:655–663.
- 600 Nykänen, H., and J. Koricheva. 2004. Damage-induced changes in woody plants and their  
601 effects on insect herbivore performance: a meta-analysis. *Oikos* 104:247–268.
- 602 Oleksyn, J., P. Karolewski, M. J. Giertych, R. Zytowskiak, P. B. Reich, and M. G. Tjoelker.  
603 1998. Primary and secondary host plants differ in leaf-level photosynthetic response  
604 to herbivory: evidence from *Alnus* and *Betula* grazed by the alder beetle, *Agelastica*  
605 *alni*. *New Phytologist* 140:239–249.
- 606 Poelman, E. H., C. Broekgaarden, J. J. A. Van Loon, and M. Dicke. 2008. Early season  
607 herbivore differentially affects plant defence responses to subsequently colonizing  
608 herbivores and their abundance in the field. *Molecular Ecology* 17:3352–3365.
- 609 Rennie, S., J. Adamson, R. Anderson, C. Andrews, J. Bater, N. Bayfield, K. Beaton, D.  
610 Beaumont, S. Benham, V. Bowmaker, C. Britt, R. Brooker, D. Brooks, J. Brunt, G.  
611 Common, R. Cooper, S. Corbett, N. Critchley, P. Dennis, J. Dick, B. Dodd, N. Dodd,  
612 N. Donovan, J. Easter, E. Eaton, M. Flexen, A. Gardiner, D. Hamilton, P. Hargreaves,  
613 M. Hatton-Ellis, M. Howe, J. Kahl, M. Lane, S. Langan, D. Lloyd, B. McCarney, Y.  
614 McElarney, C. McKenna, S. McMillan, F. Milne, L. Milne, M. Morecroft, M.  
615 Murphy, A. Nelson, H. Nicholson, D. Pallett, D. Parry, I. Pearce, G. Pozsgai, R. Rose,  
616 S. Schafer, T. Scott, L. Sherrin, C. Shortall, R. Smith, P. Smith, R. Tait, C. Taylor, M.  
617 Taylor, M. Thurlow, A. Turner, K. Tyson, H. Watson, M. Whittaker, M. Wilkinson,

- 618 and C. Wood. 2017. UK Environmental Change Network (ECN) meteorology data:  
619 1991-2015. NERC Environmental Information Data Centre.
- 620 Retuerto, R., B. Fernandez-Lema, Rodriguez-Roiloa, and J. R. Obeso. 2004. Increased  
621 photosynthetic performance in holly trees infested by scale insects. *Functional*  
622 *Ecology* 18:664–669.
- 623 Russell, C. A., K. R. Kosola, E. A. Paul, and G. P. Robertson. 2004. Nitrogen cycling in  
624 poplar stands defoliated by insects. *Biogeochemistry* 68:365–381.
- 625 Savill, P. S., editor. 2011. *Wytham woods: Oxford's ecological laboratory*. Oxford Univ.  
626 Press, Oxford.
- 627 Schäfer, K. V. R., K. L. Clark, N. Skowronski, and E. P. Hamerlynck. 2010. Impact of insect  
628 defoliation on forest carbon balance as assessed with a canopy assimilation model.  
629 *Global Change Biology* 16:546–560.
- 630 Schmitz, O. J., P. A. Raymond, J. A. Estes, W. A. Kurz, G. W. Holtgrieve, M. E. Ritchie, D.  
631 E. Schindler, A. C. Spivak, R. W. Wilson, M. A. Bradford, V. Christensen, L.  
632 Deegan, V. Smetacek, M. J. Vanni, and C. C. Wilmers. 2014. Animating the carbon  
633 cycle. *Ecosystems* 17:344–359.
- 634 Schoonhoven, L. M., J. J. A. van Loon, and M. Dicke. 2005. *Insect-plant biology*. 2nd ed.  
635 Oxford University Press, Oxford, UK.
- 636 Schwachtje, J., and I. T. Baldwin. 2008. Why does herbivore attack reconfigure primary  
637 metabolism? *Plant Physiology* 146:845–851.
- 638 Stiling, P., D. Moon, A. Rossi, B. A. Hungate, and B. Drake. 2009. Seeing the forest for the  
639 trees: long-term exposure to elevated CO<sub>2</sub> increases some herbivore densities. *Global*  
640 *Change Biology* 15:1895–1902.

- 641 Stokes, V. 2000. Effects of microenvironment and leaf developmental characteristics on  
642 annual carbon gain and water use in two deciduous tree species. DPhil, University of  
643 Oxford.
- 644 Strickland, M. S., D. Hawlena, A. Reese, M. A. Bradford, and O. J. Schmitz. 2013. Trophic  
645 cascade alters ecosystem carbon exchange. *Proceedings of the National Academy of*  
646 *Sciences* 110:11035–11038.
- 647 Strong, D. R., J. H. Lawton, and R. Southwood. 1984. *Insects on Plants*. First edition.  
648 Blackwells Scientific Publications, Southampton, United Kingdom.
- 649 Thomas, M. V., Y. Malhi, K. M. Fenn, J. B. Fisher, M. D. Morecroft, C. R. Lloyd, M. E.  
650 Taylor, and D. D. McNeil. 2011. Carbon dioxide fluxes over an ancient broadleaved  
651 deciduous woodland in southern England. *Biogeosciences* 8:1595–1613.
- 652 Thomson, V., S. Cunningham, M. Ball, and A. Nicotra. 2003. Compensation for herbivory by  
653 *Cucumis sativus* through increased photosynthetic capacity and efficiency. *Oecologia*  
654 134:167–175.
- 655 Varley, G. C., and G. R. Gradwell. 1962. The effect of partial defoliation by caterpillars on  
656 the timber production by oak trees in England. *Proceedings of the XIth International*  
657 *Congress of Entomology (Vienna 1960)* 2:211–214.
- 658 Visakorpi, K., S. Gripenberg, Y. Malhi, C. Bolas, I. Oliveras, N. Harris, S. Rifai, and T.  
659 Riutta. 2018. Small-scale indirect plant responses to insect herbivory could have  
660 major impacts on canopy photosynthesis and isoprene emission. *New Phytologist* 220.
- 661 Visakorpi, K., T. Riutta, Y. Malhi, J.-P. Salminen, N. Salinas, and S. Gripenberg. 2020.  
662 Changes in oak (*Quercus robur*) photosynthesis after winter moth (*Operophtera*  
663 *brumata*) herbivory are not explained by changes in chemical or structural leaf traits.  
664 *PLOS ONE* 15:e0228157.

- 665 Walker, K. 2017. Variation and patterns of CO<sub>2</sub> efflux and sapwood content of three  
666 deciduous broadleaved trees. B.S. thesis, University of Oxford, Oxford, UK.
- 667 Wertin, T. M., and R. O. Teskey. 2008. Close coupling of whole-plant respiration to net  
668 photosynthesis and carbohydrates. *Tree Physiology* 28:1831–1840.
- 669 Whitehead, D., K. L. Griffin, M. H. Turnbull, D. T. Tissue, V. C. Engel, K. J. Brown, W. S.  
670 F. Schuster, and A. S. Walcroft. 2004. Response of total night-time respiration to  
671 differences in total daily photosynthesis for leaves in a *Quercus rubra* L. canopy:  
672 implications for modelling canopy CO<sub>2</sub> exchange. *Global Change Biology* 10:925–  
673 938.
- 674 Whittaker, J. B., and S. Warrington. 1985. An Experimental Field Study of Different Levels  
675 of Insect Herbivory Induced By *Formica rufa* Predation on Sycamore (*Acer*  
676 *pseudoplatanus*) III. Effects on Tree Growth. *The Journal of Applied Ecology* 22:797.
- 677 Wiegert, R. G., and C. E. Petersen. 1983. Energy transfer in insects. *Annual Review of*  
678 *Entomology* 28:455–486.
- 679 Wilmers, C. C., and O. J. Schmitz. 2016. Effects of gray wolf-induced trophic cascades on  
680 ecosystem carbon cycling. *Ecosphere* 7:e01501.
- 681 Zangerl, A. R., J. G. Hamilton, T. J. Miller, A. R. Crofts, K. Oxborough, M. R. Berenbaum,  
682 and E. H. DeLucia. 2002. Impact of folivory on photosynthesis is greater than the sum  
683 of its holes. *Proceedings of the National Academy of Sciences* 99:1088–1091.
- 684 Zimov, N. S., S. A. Zimov, A. E. Zimova, G. M. Zimova, V. I. Chuprynin, and F. S. Chapin.  
685 2009. Carbon storage in permafrost and soils of the mammoth tundra-steppe biome:  
686 Role in the global carbon budget. *Geophysical Research Letters* 36.
- 687 Zvereva, E. L., V. Zverev, and M. V. Kozlov. 2012. Little strokes fell great oaks: minor but  
688 chronic herbivory substantially reduces birch growth. *Oikos* 121:2036–2043.
- 689

690 **Table 1.** Characteristics of the study site, and the five oak trees used for the gas exchange measurements and  
 691 herbivory manipulations. Errors are  $\pm 1$  SEM.

| Plot-level measures                           | Value                                                    | Year             | Reference                          |
|-----------------------------------------------|----------------------------------------------------------|------------------|------------------------------------|
| Annual rainfall                               | 637 mm                                                   | 2015             | Rennie et al. 2017                 |
| Mean annual temperature                       | 10.2 °C                                                  | 2015             | Rennie et al. 2017                 |
| Mean daytime summer temperature               | 13.8 °C                                                  | 2015             | Rennie et al. 2017                 |
| Mean night-time summer temperature            | 10.7 °C                                                  | 2015             | Rennie et al. 2017                 |
| Total stem density (>1 cm dbh)                | 1128.2 ha <sup>-1</sup>                                  | 2008             | Butt et al. 2009                   |
| Total basal area (>10 cm dbh)                 | 33.3 m <sup>2</sup> ha <sup>-1</sup>                     | 2008             | Butt et al. 2009                   |
| Peak LAI                                      | 7.8 m <sup>2</sup> m <sup>-2</sup>                       | 2008             | Thomas et al. 2011                 |
|                                               | 6.5 m <sup>2</sup> m <sup>-2</sup>                       | 2007             | Fenn 2010                          |
|                                               | ca. 6.5 m <sup>2</sup> m <sup>-2</sup>                   |                  | Nils Rutjes 2016, unpublished data |
| Stem area index                               | 1.5 m <sup>2</sup> m <sup>-2</sup>                       | 2008             | Fenn et al. 2015                   |
| Average oak budburst                          | 19 <sup>th</sup> April                                   | 1996, 1999, 2000 | Morecroft et al. 2003              |
| 100% oak leaf fall                            | 22 <sup>nd</sup> November                                | 2007             | Fenn 2010                          |
| Peak oak photosynthesis                       | 4 <sup>th</sup> July                                     | 1999             | Morecroft et al. 2003              |
| Percentage of oak of total LAI                | 11 $\pm$ 3 %                                             | 2007             | Fenn 2010                          |
| Oak basal area                                | 6.7 m <sup>2</sup> ha <sup>-1</sup>                      | 2008             | Butt et al. 2009                   |
| Biometric GPP                                 | 21.9 Mg C ha <sup>-1</sup> yr <sup>-1</sup>              | 2008             | Fenn et al. 2015                   |
| Eddy flux GPP                                 | 21.1 Mg C ha <sup>-1</sup> yr <sup>-1</sup>              | 2008             | Thomas et al. 2011                 |
| Biometric NPP                                 | 7.0 Mg C ha <sup>-1</sup> yr <sup>-1</sup>               | 2008             | Fenn et al. 2015                   |
| Eddy flux NEP                                 | 1.2 Mg C ha <sup>-1</sup> yr <sup>-1</sup>               | 2008             | Thomas et al. 2011                 |
| Biometric R <sub>eco</sub>                    | 20.3 Mg C ha <sup>-1</sup> yr <sup>-1</sup>              | 2008             | Fenn et al. 2015                   |
| Eddy flux R <sub>eco</sub>                    | 19.8 Mg C ha <sup>-1</sup> yr <sup>-1</sup>              | 2008             | Thomas et al. 2011                 |
| <b>The five intensively studied oak trees</b> |                                                          |                  |                                    |
| Age                                           | 150 - 200 years                                          |                  | Morecroft et al. 2003              |
| Mean dbh                                      | 67.2 cm $\pm$ 5.4 cm                                     | 2017             | Y. Malhi, unpublished analysis     |
| Mean height                                   | 21.6 m $\pm$ 0.6 m                                       | 2017             | this study                         |
| Mean % of herbivory                           | 5.9 % $\pm$ 0.4 %                                        | 2015             | Visakorpi et al. 2018              |
| Mean A <sub>sat</sub>                         | 16.1 $\pm$ 1.2 $\mu$ mol m <sup>-2</sup> s <sup>-1</sup> | 2015             | Visakorpi et al. 2018              |
| Mean leaf mass per area                       | 64.6 $\pm$ 0.9 gm <sup>-2</sup>                          | 2015             | Visakorpi et al. 2020              |
| Mean C % in leaf tissue                       | 47.8 $\pm$ 0.8 %                                         | 2016             | Visakorpi et al. 2020              |

692  
 693 **dbh – diameter at breast height (1.3 m), LAI – leaf area index, GPP – gross primary**  
 694 **productivity, NPP – net primary productivity, NEP – net ecosystem productivity, R<sub>eco</sub> –**  
 695 **ecosystem respiration, A<sub>sat</sub> – light saturated photosynthesis**  
 696

697

698 **Table 2.** Oak net primary productivity (NPP) for intact canopy and canopy under normal level of herbivory and  
 699 the effect of herbivory on the NPP estimated with different methods (canopy upscaling, biometric  
 700 measurements, and tree census) and at different scales: a hypothetical plot consisting only of oak trees (basal  
 701 area of 33.3 m<sup>2</sup> ha<sup>-1</sup>), and the measured site (basal area of oaks 6.7 m<sup>2</sup> ha<sup>-1</sup>, 20% of the total basal area). The  
 702 errors are propagated measuring errors and uncertainties related to the different scaling functions. The unit in the  
 703 table is Mg C ha<sup>-1</sup> year<sup>-1</sup>.

|                                                | <b>NPP<br/>Normal<br/>herbivory</b> | <b>±<br/>error</b> | <b>NPP<br/>Intact<br/>canopy</b> | <b>±<br/>error</b> | <b>Herbivory<br/>effect, C</b> | <b>±<br/>error</b> | <b>Herbivory<br/>effect %</b> | <b>±<br/>error</b> |
|------------------------------------------------|-------------------------------------|--------------------|----------------------------------|--------------------|--------------------------------|--------------------|-------------------------------|--------------------|
| <b>Per plot of only oak</b>                    |                                     |                    |                                  |                    |                                |                    |                               |                    |
| Canopy<br>upscaling                            | 3.8                                 | 4.9                | 12.3                             | 8.2                | 8.5                            | 5.1                | 69.4                          | 41.6               |
| Biometric<br>measurements                      | 4.6                                 | 1.1                | 10.0                             | 1.8                | 5.4                            | 2.1                | 54.3                          | 20.9               |
| Tree census                                    | 3.5                                 | 0.6                | 7.5                              | 2.2                | 4.1                            | 2.3                | 54.3                          | 30.4               |
| <b>Per real plot (counting only oak trees)</b> |                                     |                    |                                  |                    |                                |                    |                               |                    |
| Canopy<br>upscaling                            | 0.8                                 | 1.0                | 2.5                              | 1.7                | 1.7                            | 1.0                | 69.4                          | 41.6               |
| Biometric<br>measurements                      | 0.9                                 | 0.2                | 2.0                              | 0.4                | 1.1                            | 0.4                | 54.3                          | 20.9               |
| Tree census                                    | 0.6                                 | 0.1                | 1.2                              | 0.4                | 0.7                            | 0.4                | 54.3                          | 30.4               |

704

705

706 **Table 3.** Previous estimates on the effects of insect herbivores on ecosystem carbon cycling. The baseline estimate represents productivity under normal level of herbivory  
 707 (e.g. before an insect outbreak), or in the absence of herbivores (this study and Dungan et al. 2007). Herbivory level is percentage of leaf area loss, unless otherwise stated.

| Reference           | Baseline<br>Mg C<br>ha <sup>-1</sup> yr <sup>-1</sup> | Baseline<br>measure      | Herbivore<br>effect Mg<br>C ha <sup>-1</sup> yr <sup>-1</sup> | Herbivore<br>effect % | Method                                              | Study system                                            | Herbivore species                                       | Herbivory<br>level    |
|---------------------|-------------------------------------------------------|--------------------------|---------------------------------------------------------------|-----------------------|-----------------------------------------------------|---------------------------------------------------------|---------------------------------------------------------|-----------------------|
| Nardini et al. 2004 | 5                                                     | NPP                      | -4.3                                                          | -85%                  | Gas exchange<br>and canopy<br>model                 | Horse chestnut<br>( <i>Aesculus<br/>hippocastanum</i> ) | Leafminer<br>( <i>Cameraria ohridella</i> )             | 25-60% of<br>LAI      |
| Dungan et al. 2007  | 17.2                                                  | Canopy<br>photosynthesis | 0.7                                                           | 4%                    | Canopy model                                        | Beech<br>( <i>Nothofagus<br/>solandri</i> )             | Scale insect<br>( <i>Ultracoelostoma<br/>assimile</i> ) | 0 (phloem<br>feeding) |
| Cook a et al. 2008  | 3.7                                                   | NEP                      | -3.0                                                          | -79%                  | Model and<br>eddy<br>covariance                     | Temperate<br>deciduous<br>forest                        | Tent caterpillar<br>( <i>Malacosoma<br/>disstria</i> )  | 34%                   |
| Kurz et al. 2008    | -                                                     | NBP                      | -0.4                                                          | -                     | Forest<br>ecosystem<br>model                        | Pine /spruce                                            | Pine beetle<br>( <i>Dendroctonus<br/>ponderosae</i> )   | -                     |
| Clark et al. 2010   | 1.9                                                   | NEP                      | -0.7-4.8                                                      | [-34%, -57%]          | Eddy<br>covariance<br>and biometric<br>measurements | Oak /pine                                               | Gypsy moth<br>( <i>Lymantria dispar</i> )               | > 75%                 |
| Schäfer et al. 2010 | 12.4                                                  | Canopy<br>photosynthesis | -3                                                            | -24%                  | Sap-flow<br>based canopy<br>modelling               | Oak /pine                                               | Gypsy moth<br>( <i>Lymantria dispar</i> )               | > 75%                 |
| Heliasz et al. 2011 | 1.1                                                   | NEP                      | -0.9                                                          | -89%                  | Eddy<br>covariance                                  | Mountain birch<br>( <i>Betula<br/>pubescens</i> )       | Autumnal moth<br>( <i>Epirrita autumnata</i> )          | 100%                  |
| Malhi et al. 2014   | 14.2-15                                               | NPP                      | -1.5                                                          | -11%                  | Estimation of<br>leaf area loss                     | Tropical forest                                         | Several                                                 | 18.80%                |
| Flower et al. 2012  | 3.4                                                   | NPP                      | -1.5                                                          | -43%                  | Biometric<br>measurements                           | Ash ( <i>Fraxinus<br/>americana</i> )                   | Emerald ash borer                                       | -                     |

|                        |             |                   |             |              |                                        |                                   |                                               |                               |
|------------------------|-------------|-------------------|-------------|--------------|----------------------------------------|-----------------------------------|-----------------------------------------------|-------------------------------|
| Metcalfe et al. 2013   | 2-5         | Foliar production | -0.3-0.9    | [-12%, -19%] | Estimation of leaf area loss           | Tropical forest                   | Several                                       | 19-20%                        |
| Strickland et al. 2013 | -           | -                 | -           | -33%         | <sup>13</sup> C pulse chace experiment | Meadow                            | Grasshopper ( <i>Melanoplus femurrubrum</i> ) | 32gm <sup>-2</sup> of biomass |
| Lund et al. 2017       | 4.5         | NEP               | -2.6        | -58%         | Chamber-based CO <sub>2</sub> exchange | Tundra                            | Moth ( <i>Eurois occulta</i> )                | 100%                          |
| <b>this study</b>      | <b>11.1</b> | <b>Oak NPP</b>    | <b>-8.5</b> | <b>-69%</b>  | <b>Leaf gas exchange</b>               | <b>Oak (<i>Quercus robur</i>)</b> | <b>Early-season moth caterpillars</b>         | <b>6%</b>                     |
|                        |             |                   | <b>-0.1</b> |              | <b>Leaf area loss</b>                  |                                   |                                               |                               |

---

NPP – net primary productivity, NEP – net ecosystem productivity, NBP – net biome productivity

708  
709

710

711



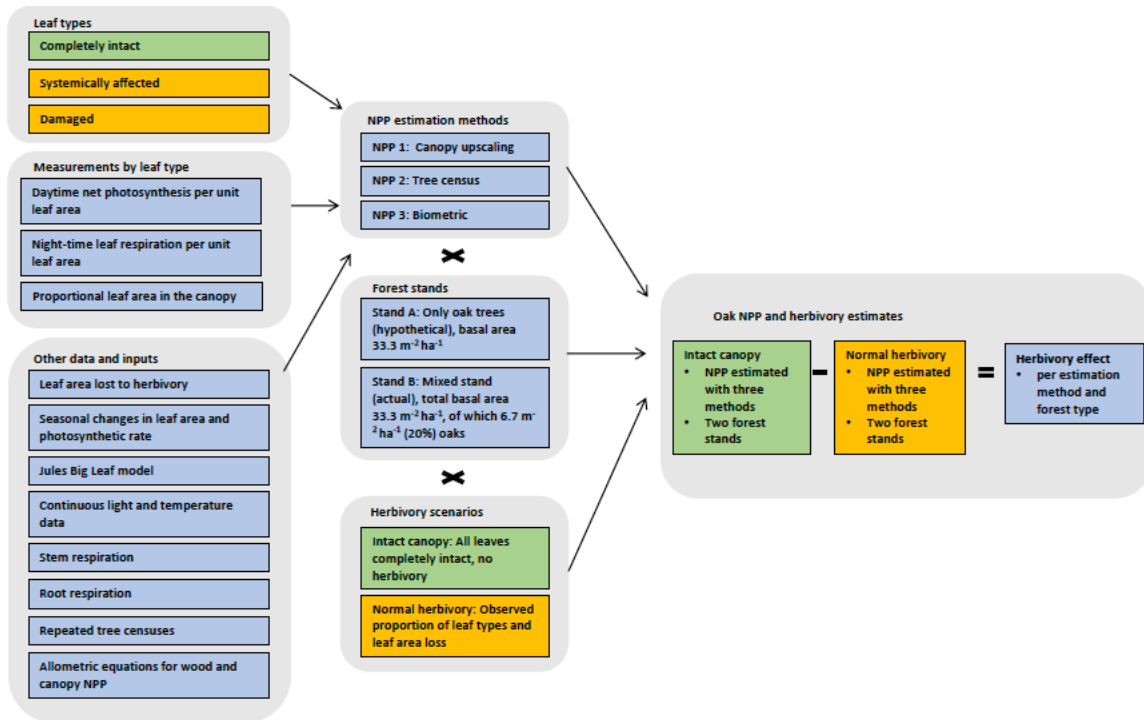

712

713 **Figure 1.** The summary of the data inputs and methods used to estimate NPP and the effect of herbivory.

714

715

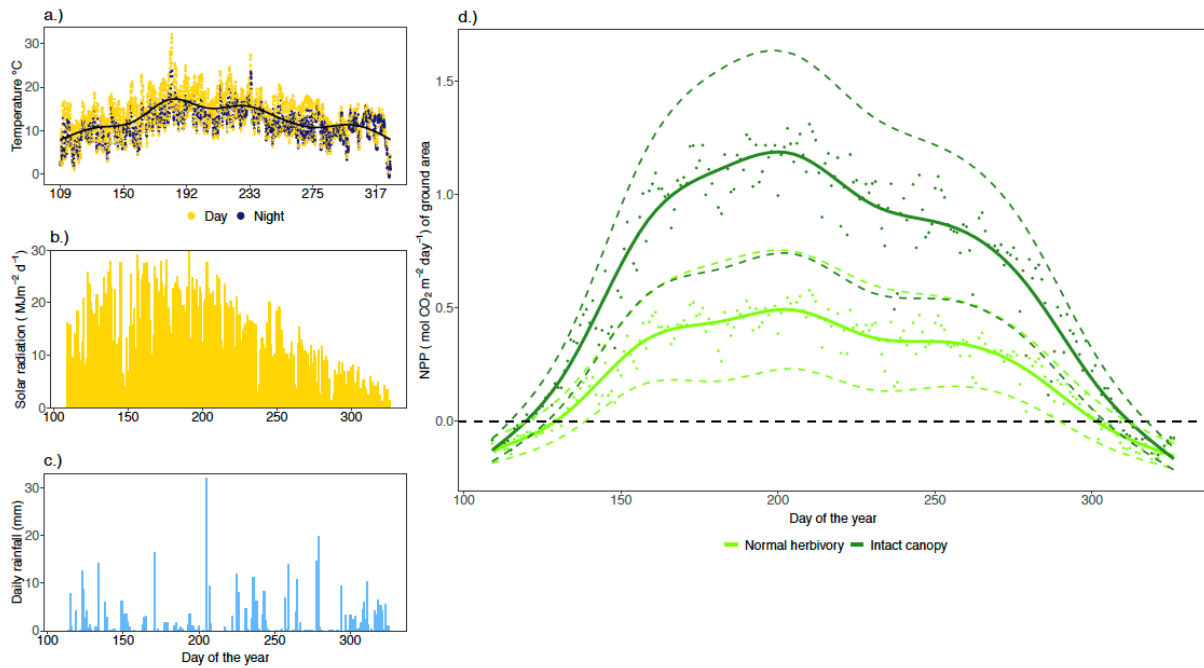

716

717 **Figure 2.** Meteorological data and net primary productivity in Wytham Woods. a) Hourly temperature for the  
718 growing season 2015 (19th April – 22nd November), which were used for upscaling stem, root and night-time  
719 canopy respiration. The average temperature was 13.8 °C during the day and 10.7 °C during the night. b) Solar  
720 radiation per day over the season 2014, which was used to upscale the canopy photosynthesis measurements. c)  
721 Amount of rainfall per day over the growing season 2015 (not used in the data analyses or upscaling). The  
722 annual rainfall (637 mm) was slightly less than the 1993–2010 average of 714 mm (Fenn et al. 2015). d) Net  
723 primary productivity (NPP) per m<sup>2</sup> of ground area based on data from five oak trees during the growing season  
724 2015. The “intact canopy” scenario is based on measurements on intact leaves surrounded by only intact leaves,  
725 whereas the estimates under “normal herbivory” are based on photosynthesis and respiration rates of three  
726 different leaf types (intact, damaged, systemically affected), weighted with their observed abundance. Each data  
727 point is a modelled estimate for the average rate of the five trees for one day. The dashed black line shows the  
728 level of zero NPP (negative values indicate that the tree is losing carbon). The solid coloured line shows a  
729 general additive model across the five trees, and the dashed coloured lines show the propagated measuring  
730 uncertainty.

731

732

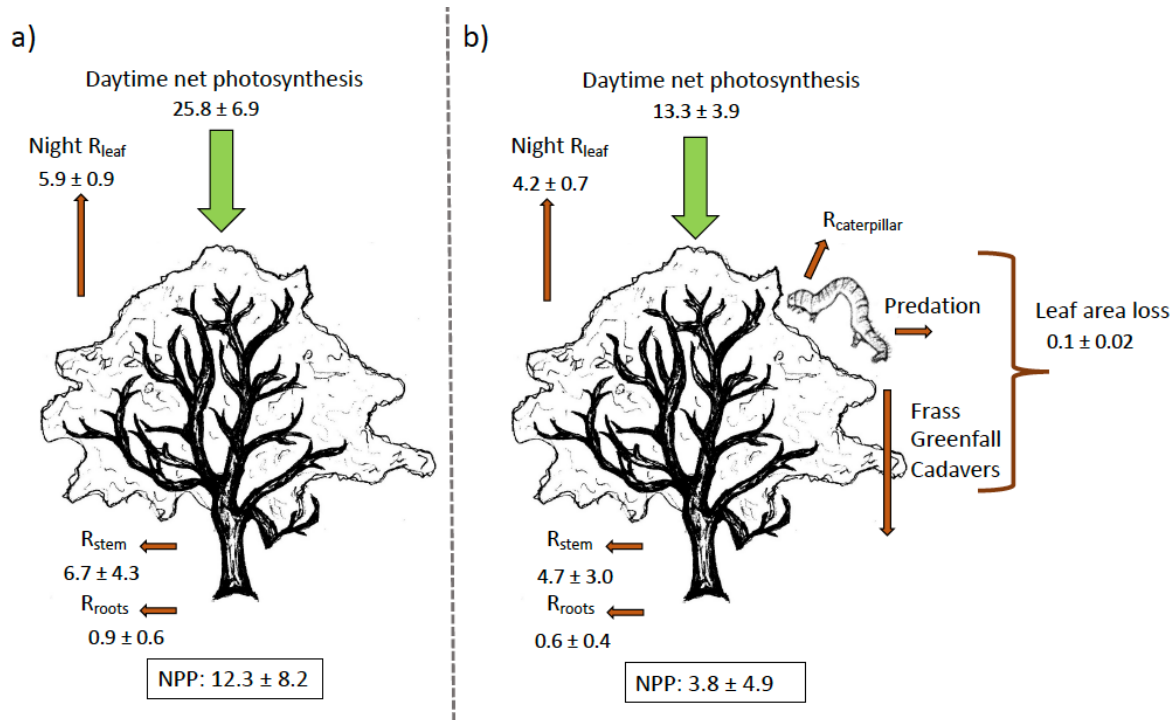

733

734 **Figure 3.** The combined carbon budget a) without and b) with herbivory for an oak forest as  $\text{Mg C ha}^{-1} \text{ yr}^{-1}$   
735 based on canopy upscaling. The carbon flux of leaf area loss ( $0.1 \text{ Mg C ha}^{-1} \text{ yr}^{-1}$ ) will continue its cycle either by  
736 entering soil as frass or insect cadavers, being respired by herbivores, or being eaten by higher trophic levels  
737 preying on caterpillars (see Figure 5). Errors are propagated measuring uncertainties. R - respiration, NPP – net  
738 primary productivity (= Photosynthesis – ( $R_{\text{leaf}} + R_{\text{stem}} + R_{\text{roots}}$ )).

739

740

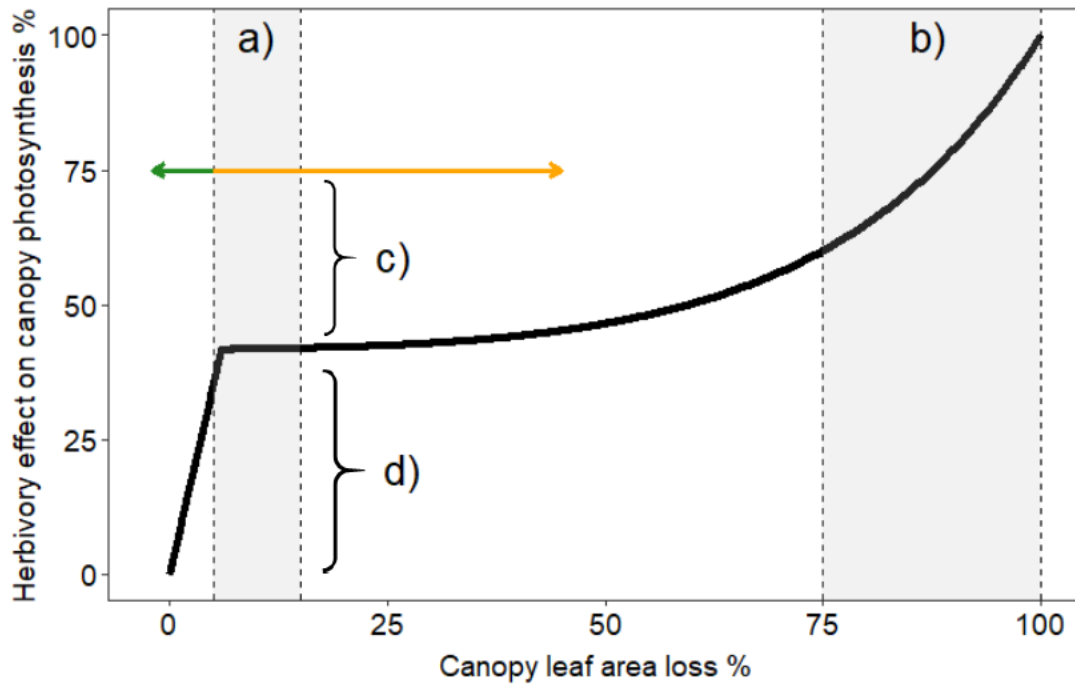

741

742 **Figure 4.** The effect of leaf area loss on daytime canopy net photosynthesis, as % reduction from the full  
743 photosynthetic capacity. The first shaded area (a) represents a typical level of herbivory in temperate forests (5-  
744 15% of leaf area loss; (Cebrian 1999). The second shaded area (b) shows leaf area loss during an insect  
745 herbivore outbreak (75-100% leaf area loss, e.g. Clark et al. 2010, Schäfer et al. 2010). At low herbivory levels,  
746 below the level at which all leaves are affected by herbivory, the herbivory effect on photosynthesis is mainly  
747 driven by the spread of systemic changes in leaf gas exchange in the undamaged leaf tissue (green arrow,  
748 “indirect effects”). Above this level, the changes in the effect of herbivory are driven by increasing leaf area loss  
749 (orange arrow). Most previous studies on the effects of herbivory on primary productivity have compared  
750 outbreak densities of herbivores to a normal level of herbivory (c). Nevertheless, we predict this effect might be  
751 smaller than comparing normal levels of herbivory to a completely intact canopy (d). See Appendix 2, Figure S6  
752 for description of the changes in the proportion of different leaf types and leaf area loss with changing herbivore  
753 densities and Appendix 3 for relationships between insect herbivory and its effect on canopy assimilation with  
754 different underlying assumptions.

755

756

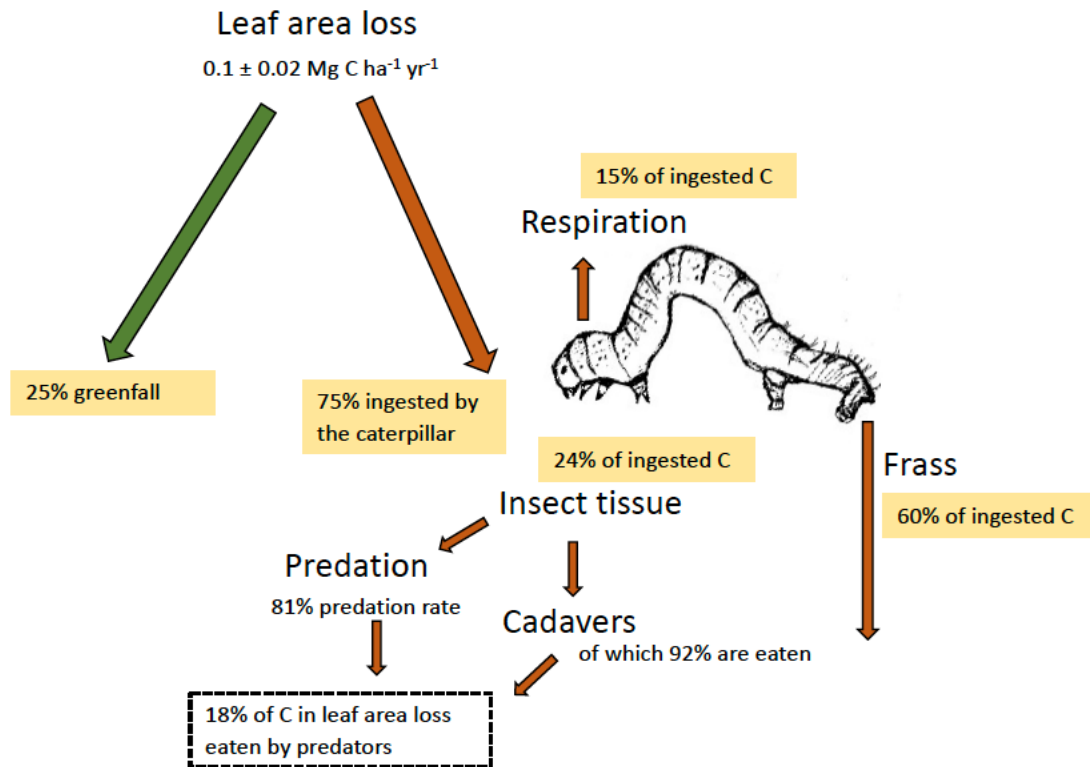

757

758 **Figure 5.** Estimating the fate of the carbon lost through eaten leaf area in the oak-caterpillar study system in  
759 Wytham Woods. Of the observed leaf area loss, roughly 75% is expected to be ingested by the caterpillar  
760 (Russell et al. 2004). Of this, 15% will be respired, 60% falls down as frass, and 24% will be used by the insect  
761 to grow and reproduce, based on earlier studies of insect energetics (Wiegert and Petersen 1983). Of winter  
762 moth caterpillars in Wytham Woods, 81% of live caterpillars and 92% of cadavers are preyed upon (East 1974).  
763 Thus, 24% of the carbon ingested by the caterpillar (or 18% of the carbon contained in the observed leaf area  
764 loss,  $0.02 \text{ Mg C ha}^{-1} \text{ yr}^{-1}$ ), is transferred to higher trophic levels.

765
